# Supplementary material for: Dynamic epistasis analysis reveals how chromatin remodeling regulates transcriptional bursting
Source: PubMed Central journal article supplement (PMC10191856; doi:10.1038/s41594-023-00981-1), 2023-05-01
Supplement: 41594_2023_981_MOESM14_ESM.pdf [file 41594_2023_981_MOESM14_ESM.pdf]

205 kDa

120 kDa

85 kDa

65 kDa

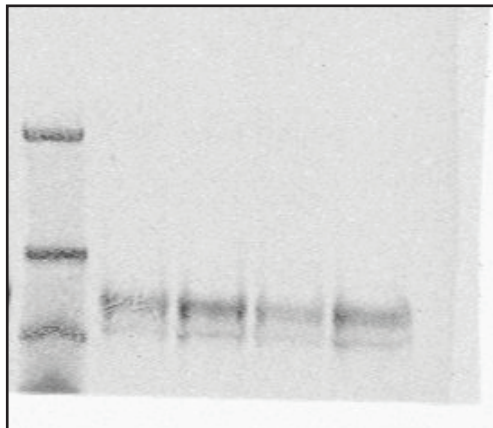

Gal4-3V5

**V5 antibody**

50 kDa

30 kDa

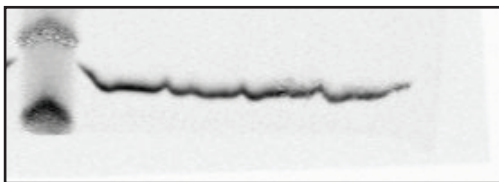

Pgk1

**Pgk1 antibody**
