# Supplementary material for: Dynamic epistasis analysis reveals how chromatin remodeling regulates transcriptional bursting
Source: PubMed Central journal article supplement (PMC10191856; doi:10.1038/s41594-023-00981-1), 2023-05-01
Supplement: 41594_2023_981_MOESM20_ESM.pdf [file 41594_2023_981_MOESM20_ESM.pdf]

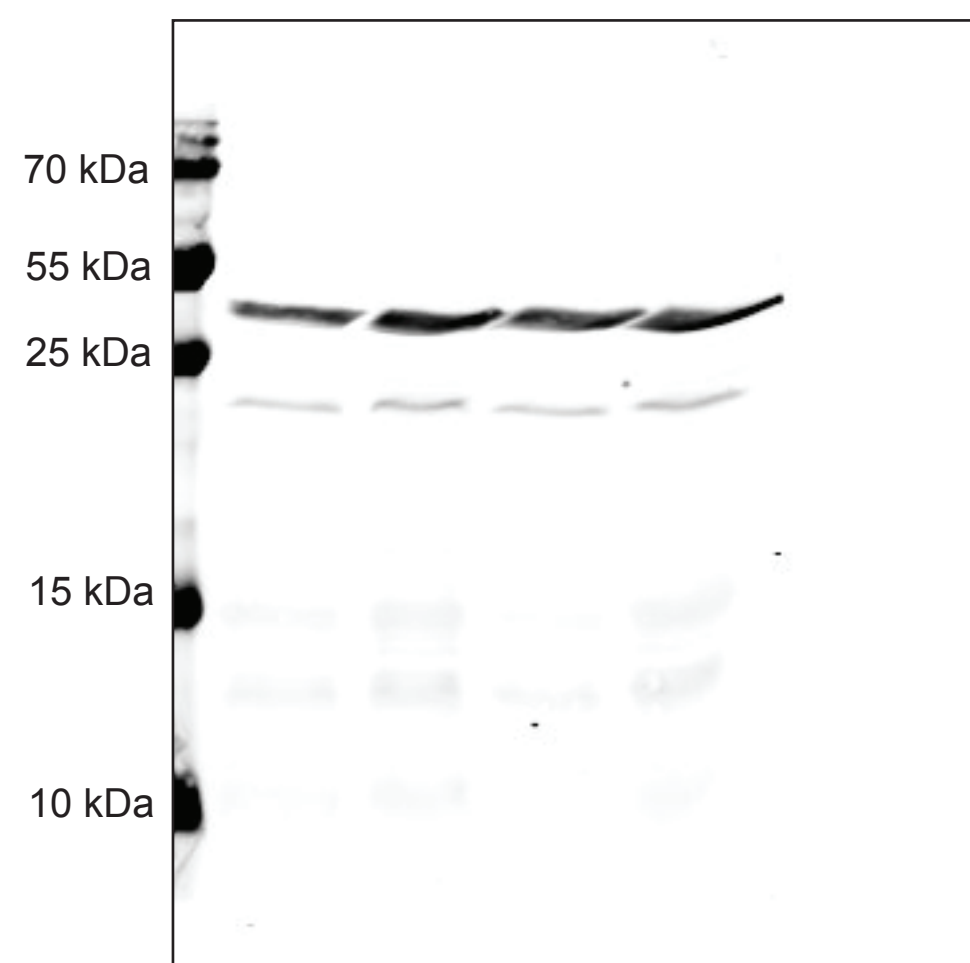

**Pgk1 antibody**

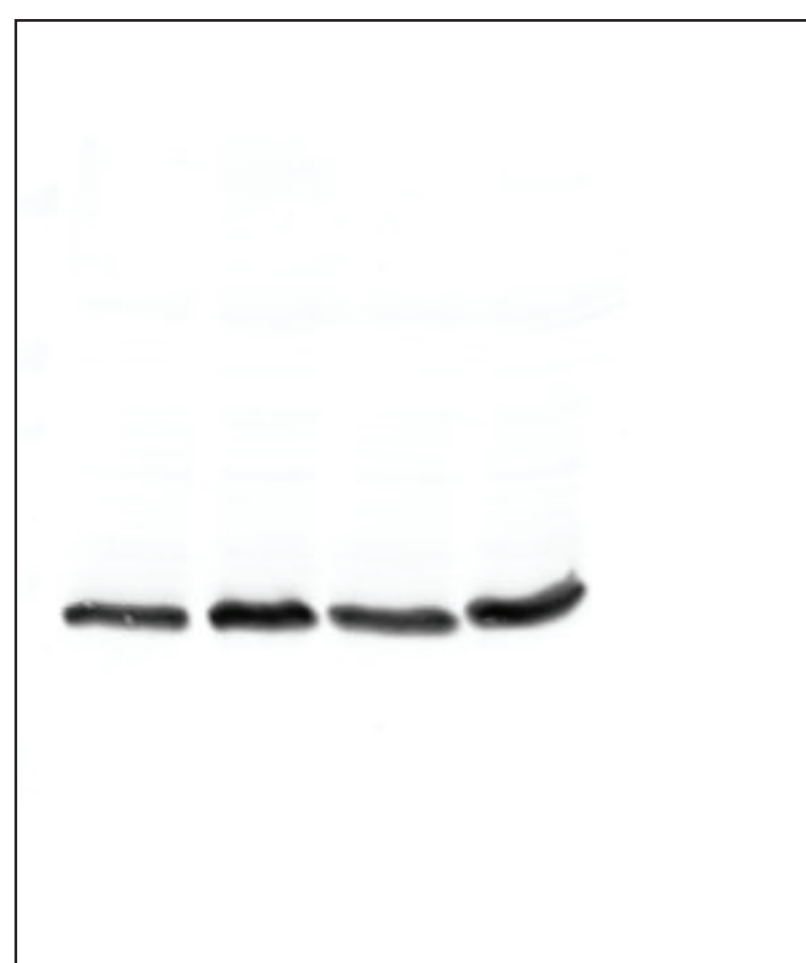

**H3 antibody**

Pgk1

H3

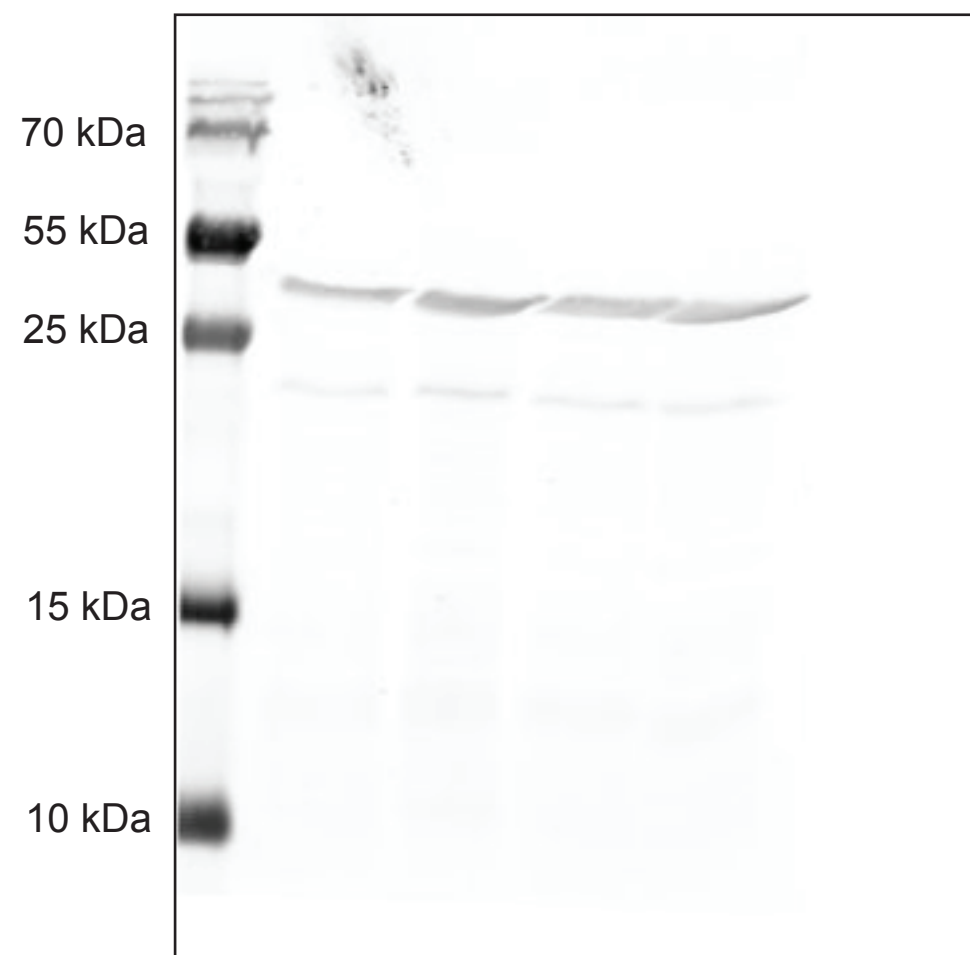

**Pgk1 antibody**

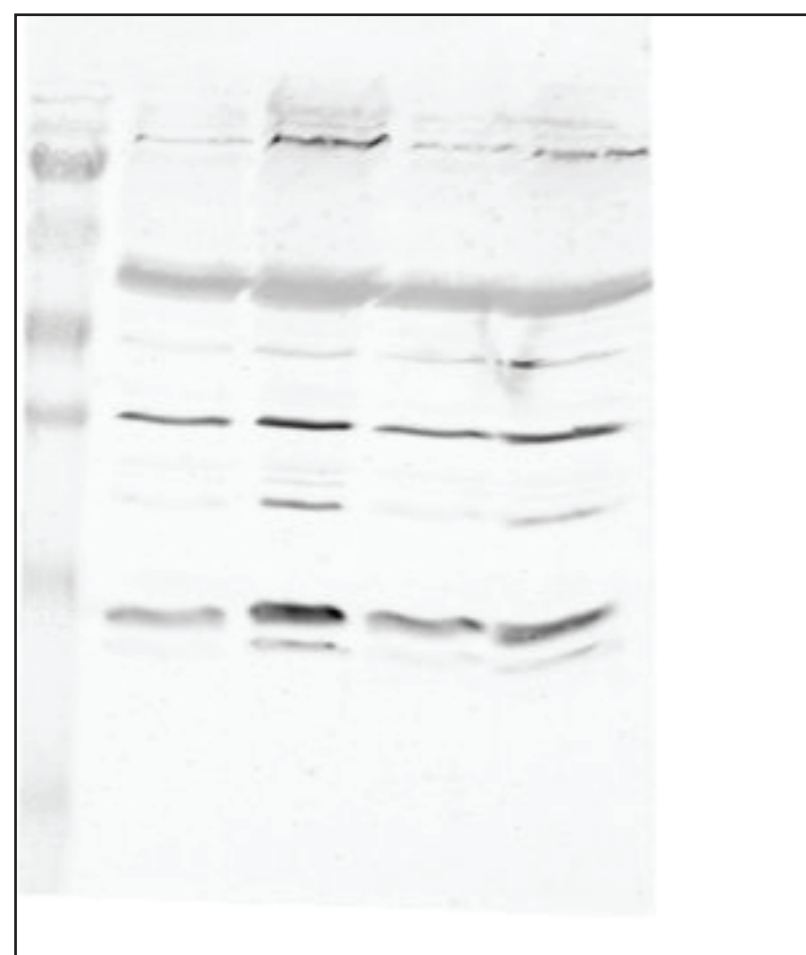

**H3K79me3 antibody**

Pgk1

H3K79me3
